# Supplementary material
Source: MDPI journal article supplement (https://www.mdpi.com/2624-781X/3/3/31)
Supplement: s1 [file s1]

# Thiol-Ene Reaction of Heparin Allyl Ester, Heparin 4-Vinylbenzyl Ester and Enoxaparin

Richard T. Taylor and Dhruba P. Poudel

## Table of Contents

|                                                                                                    |    |
|----------------------------------------------------------------------------------------------------|----|
| IR spectrum of heparin allyl ester (1).....                                                        | S2 |
| HNMR spectrum of heparin allyl ester (1).....                                                      | S2 |
| COSY spectrum of heparin allyl ester (1).....                                                      | S3 |
| IR spectrum of heparin 4-vinylbenzyl ester (2).....                                                | S4 |
| HNMR spectrum of heparin 4-vinylbenzyl ester (2).....                                              | S4 |
| COSY spectrum of heparin 4-vinylbenzyl ester (2) in vinyl aromatic region.....                     | S5 |
| IR spectrum of thiol-ene reaction of heparin allyl ester with mercaptoacetic acid (3).....         | S5 |
| HNMR spectrum of thiol-ene reaction of heparin allyl ester with mercaptoacetic acid (3).....       | S6 |
| HNMR spectrum of thiol-ene reaction of heparin 4-vinylbenzyl ester with L-cysteine (4).....        | S6 |
| HNMR spectrum of thiol-ene reaction of heparin 4-vinylbenzyl ester with octyl mercaptan (5).....   | S7 |
| HNMR spectrum of thiol-ene reaction of heparin 4-vinylbenzyl ester with 4-aminothiophenol (6)..... | S7 |
| HNMR spectrum of enoxaparin.....                                                                   | S8 |
| HNMR spectrum of thiol-ene reaction of enoxaparin and mercaptoacetic acid (7).....                 | S8 |
| HNMR spectrum of thiol-ene reaction of enoxaparin and L-cysteine (8).....                          | S9 |

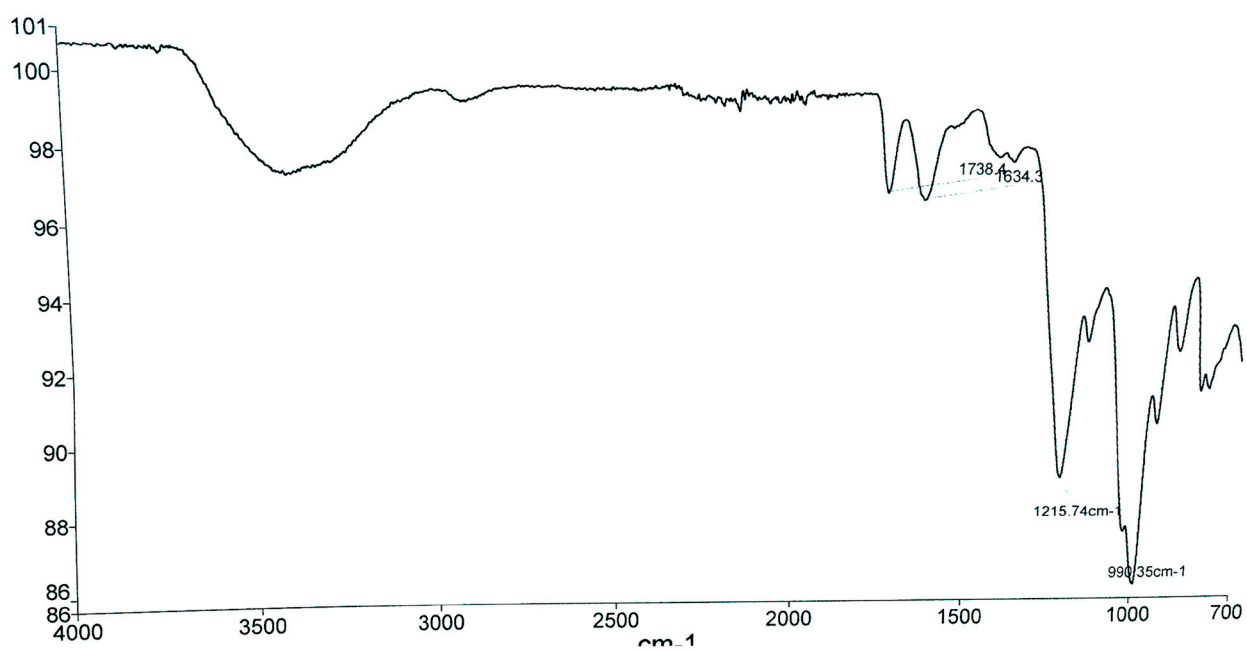

IR spectrum of heparin allyl ester (1).

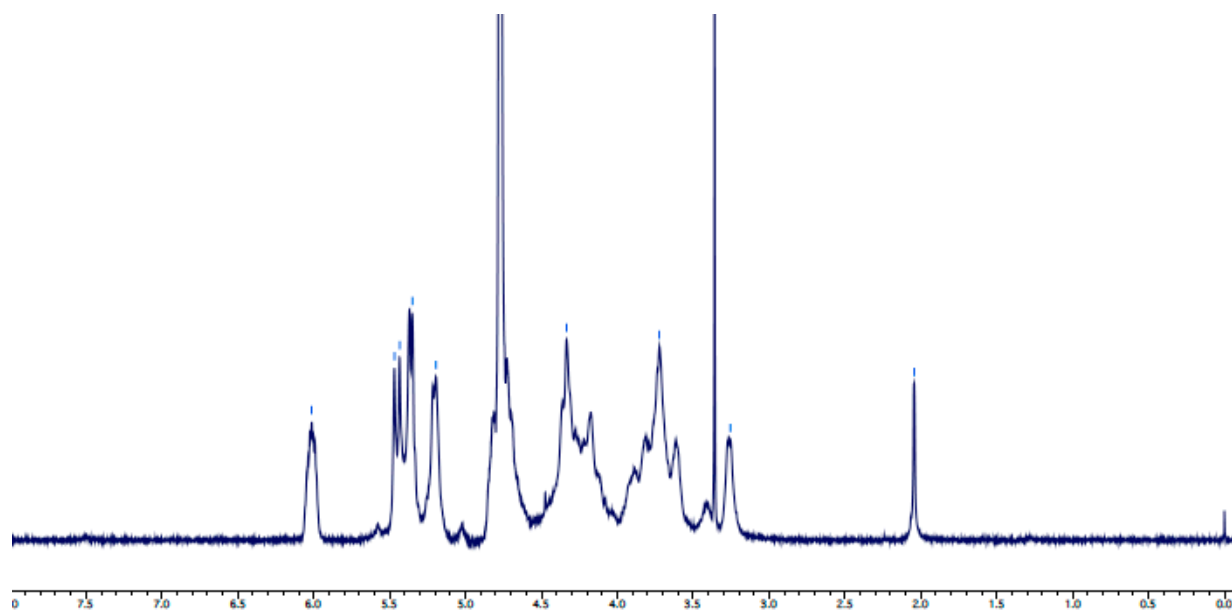 $^1\text{H}$ NMR spectrum of heparin allyl ester (1).

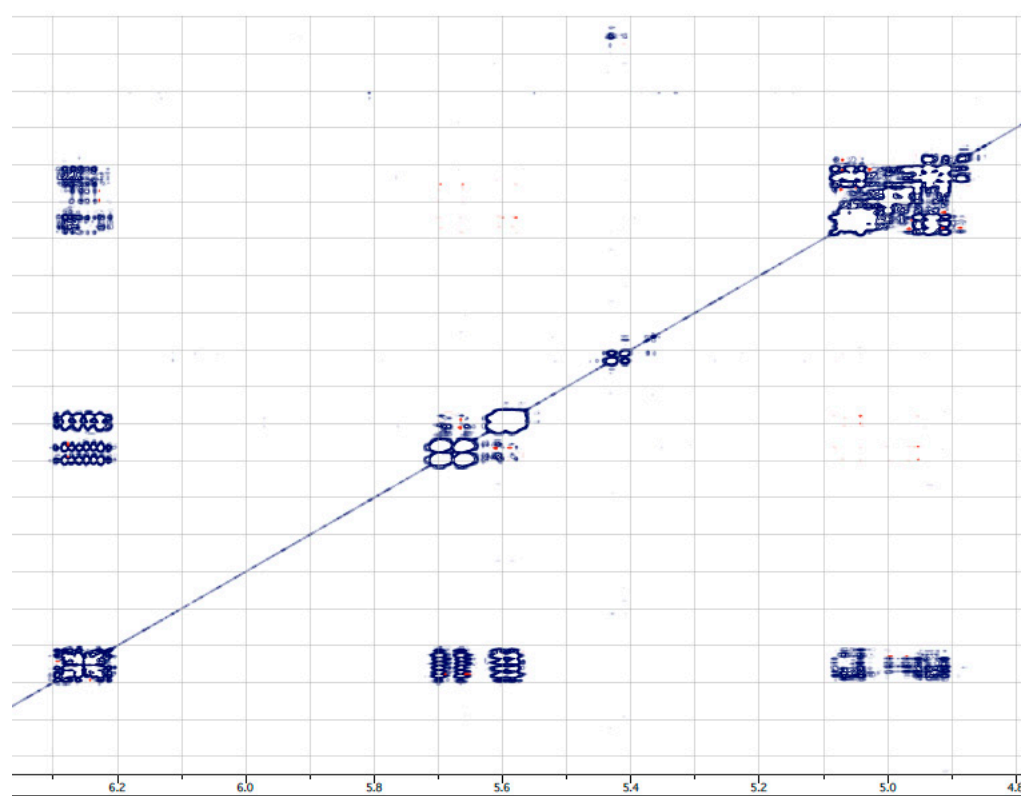

COSY spectrum of heparin allyl ester (1).

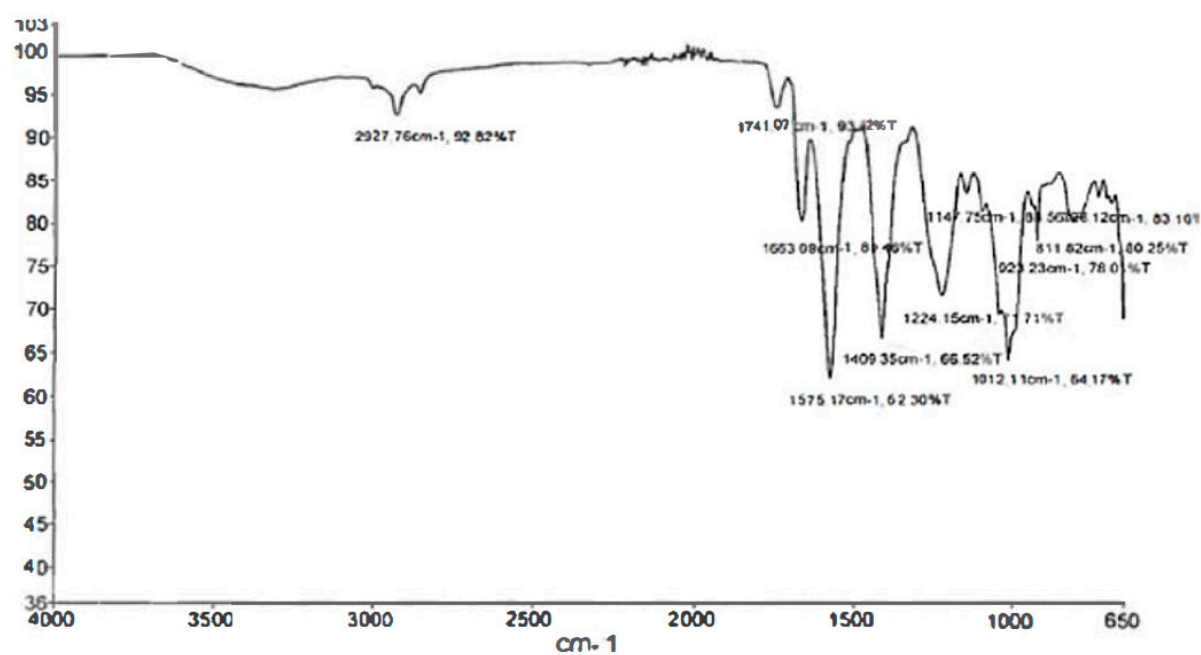

IR spectrum of heparin 4-vinylbenzyl ester (2).

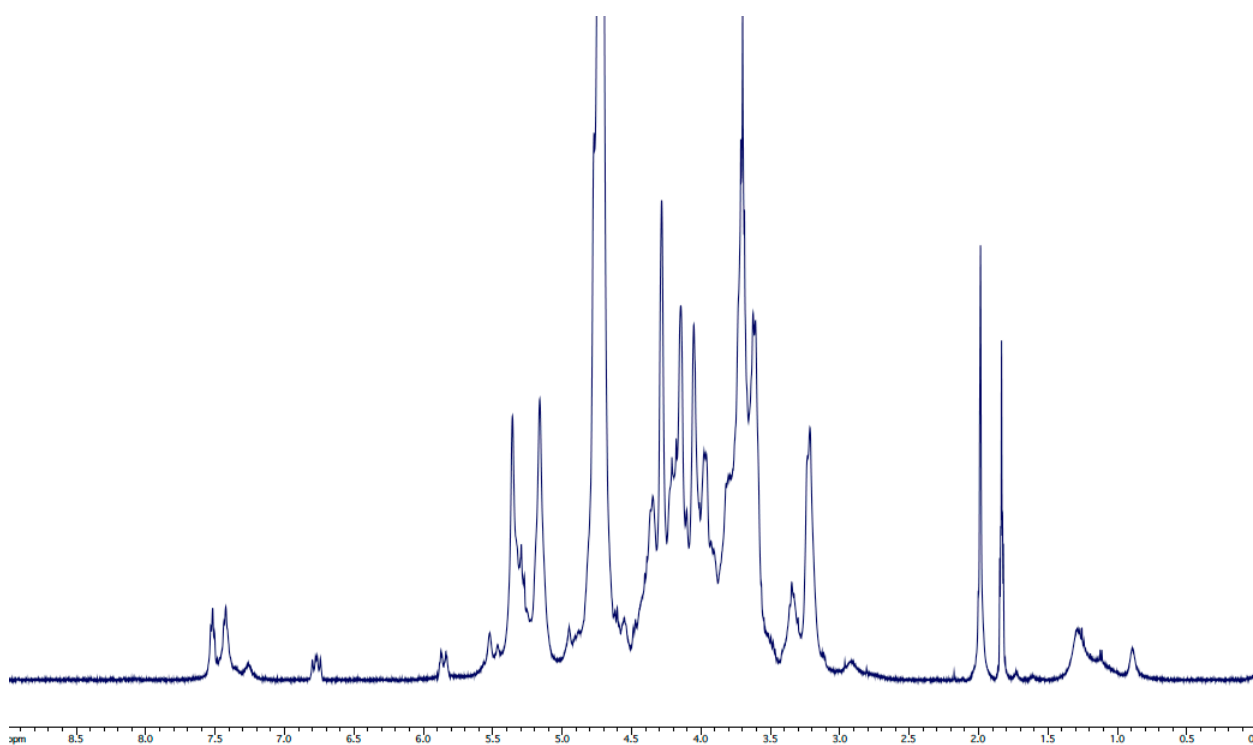

HNMR spectrum of heparin 4-vinylbenzyl ester (2).

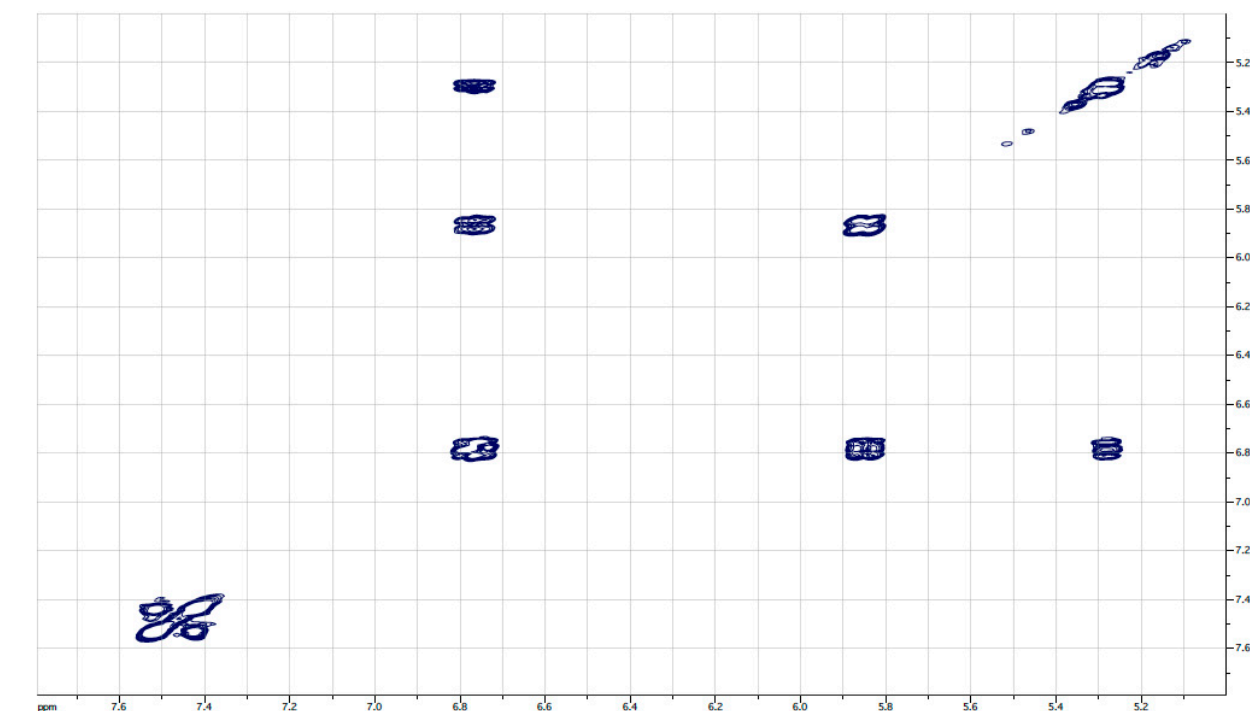

COSY spectrum of heparin 4-vinylbenzyl ester (2) in vinyl aromatic region.

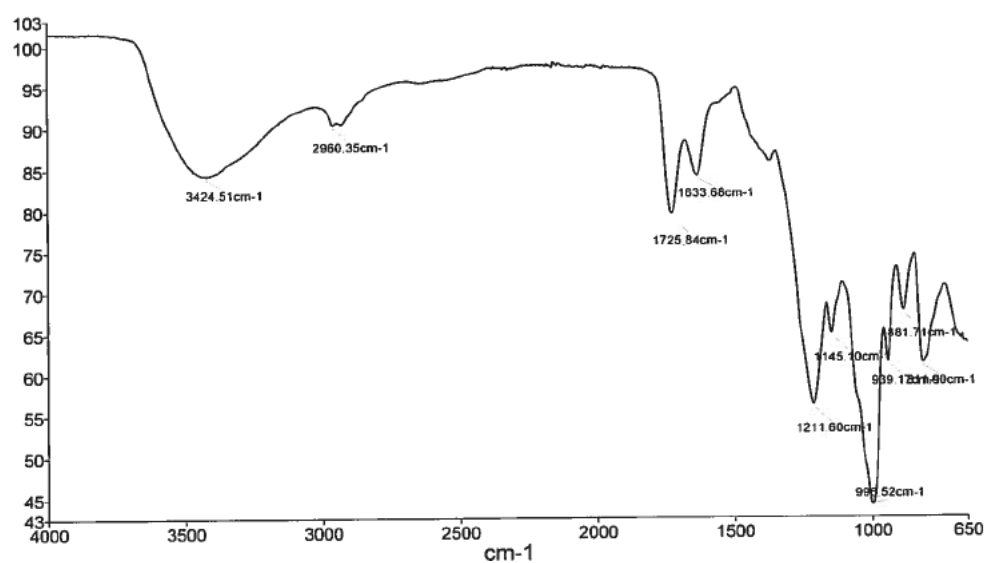

IR spectrum of thiol-ene reaction of heparin allyl ester with mercaptoacetic acid (3).

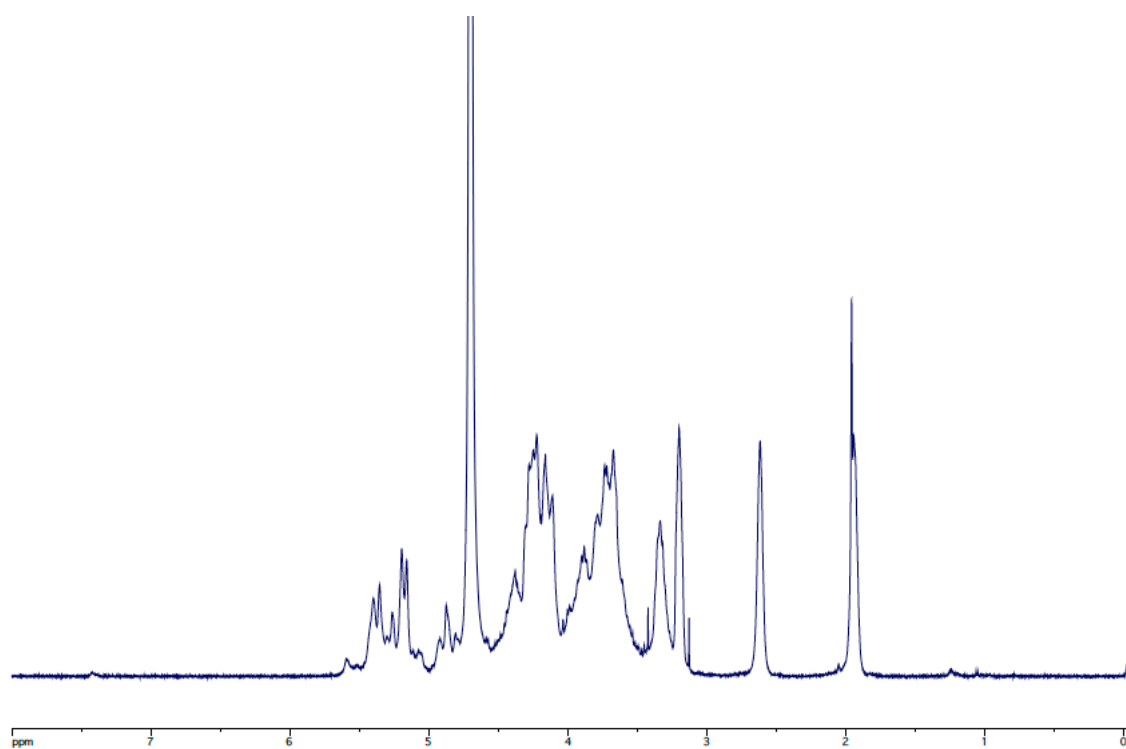

HNMR spectrum of thiol-ene reaction of heparin allyl ester with mercaptoacetic acid (3).

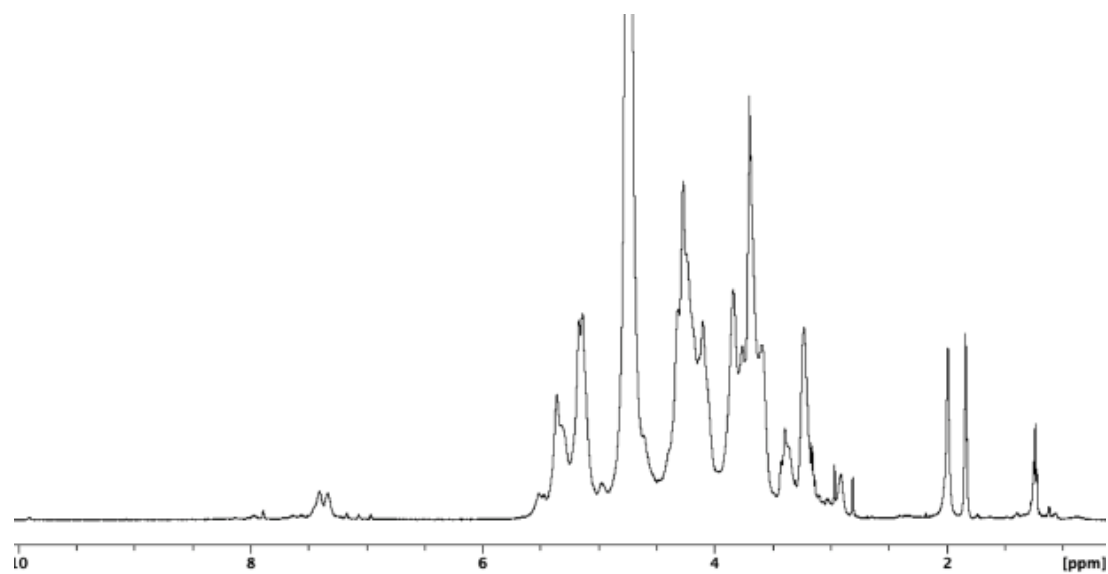

HNMR spectrum of thiol-ene reaction of heparin 4-vinylbenzyl ester with L-cysteine (4).

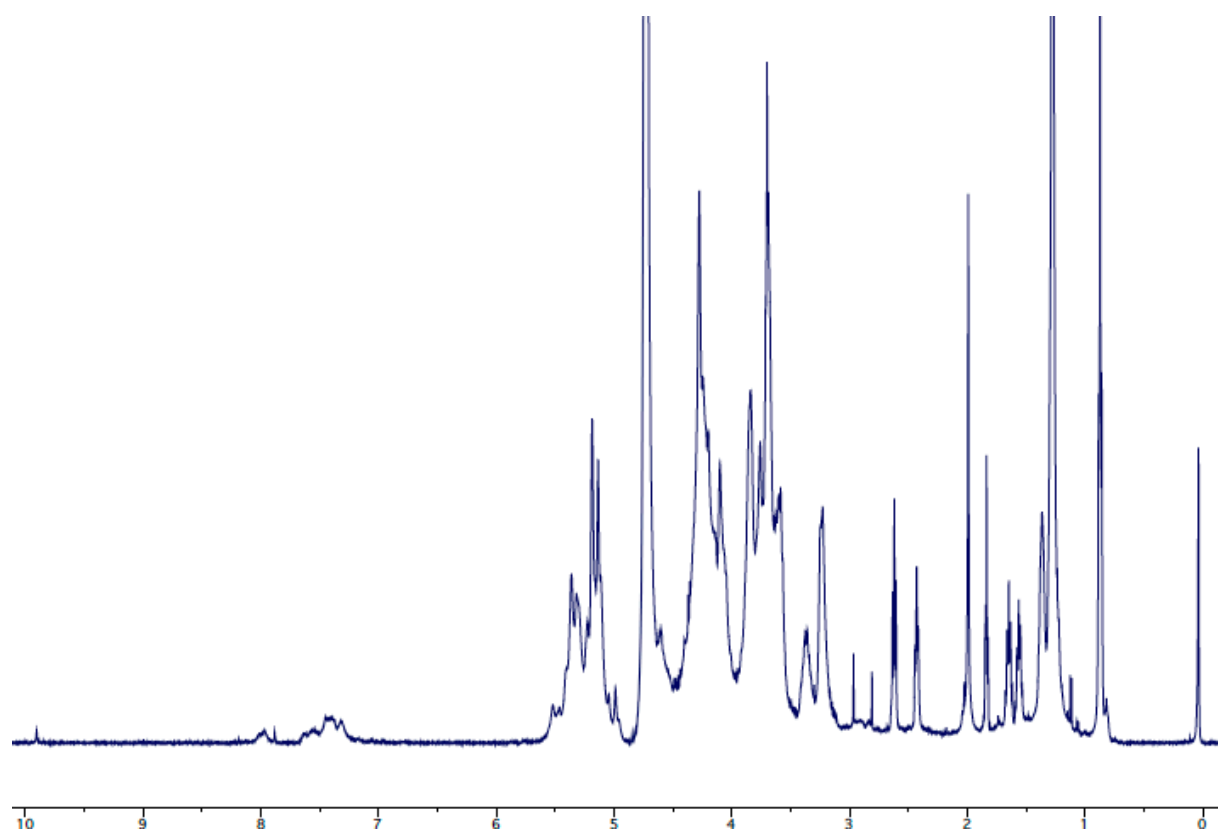

HNMR spectrum of thiol-ene reaction of heparin 4-vinylbenzyl ester with octyl mercaptan (5).

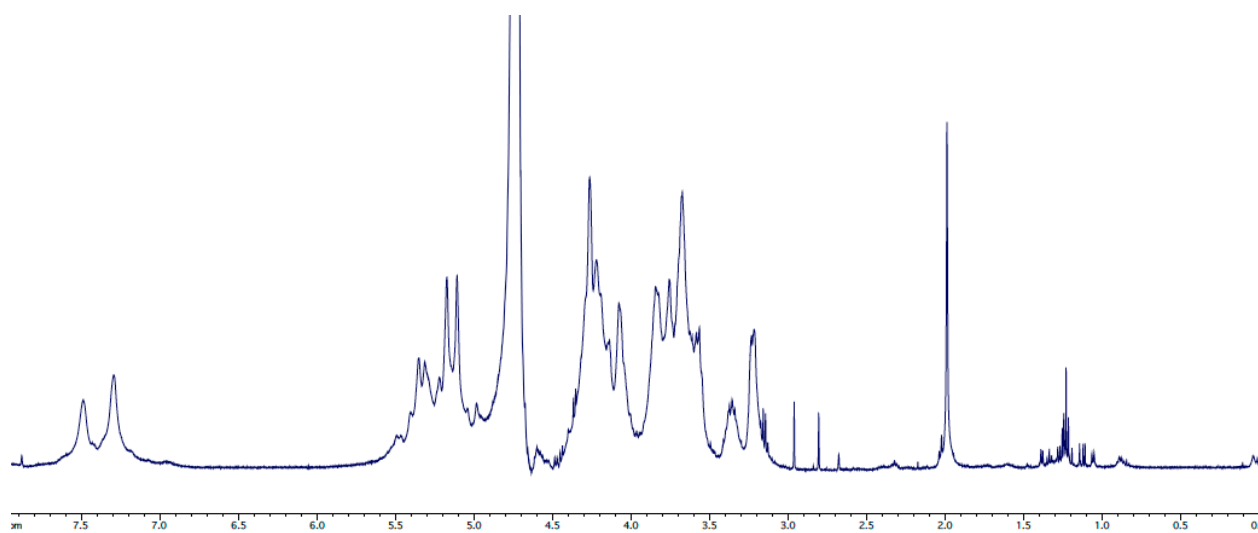

HNMR spectrum of thiol-ene reaction of heparin 4-vinylbenzyl ester with 4-aminothiophenol (6).

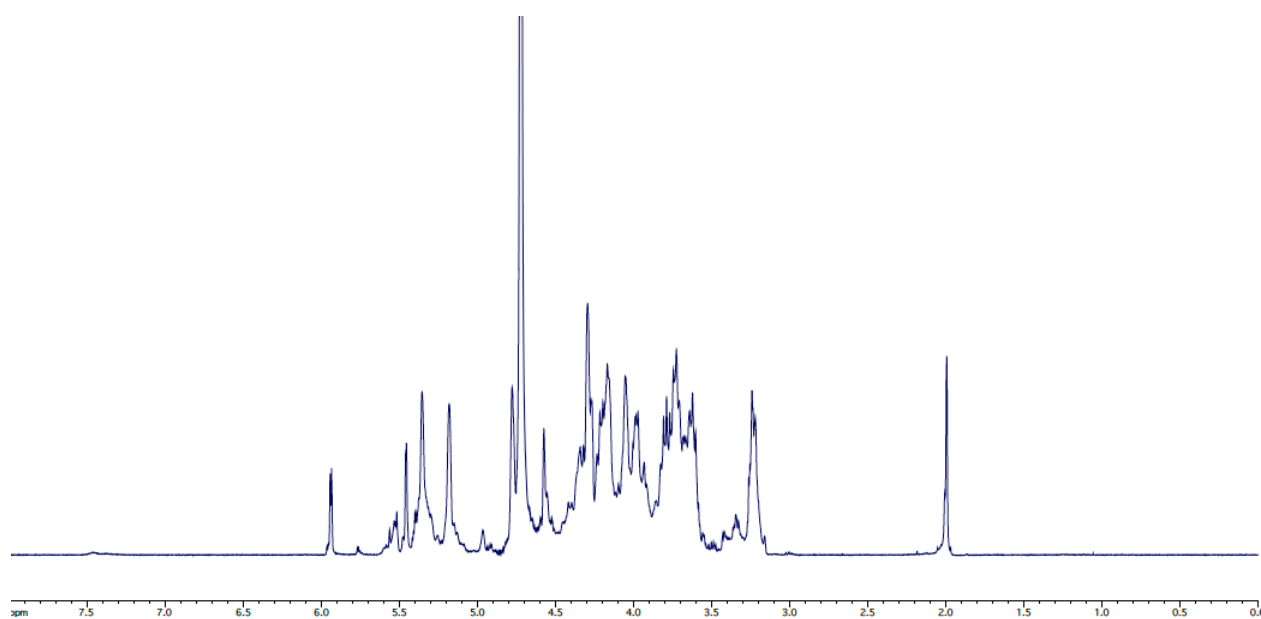

<sup>1</sup>H NMR spectrum of enoxaparin.

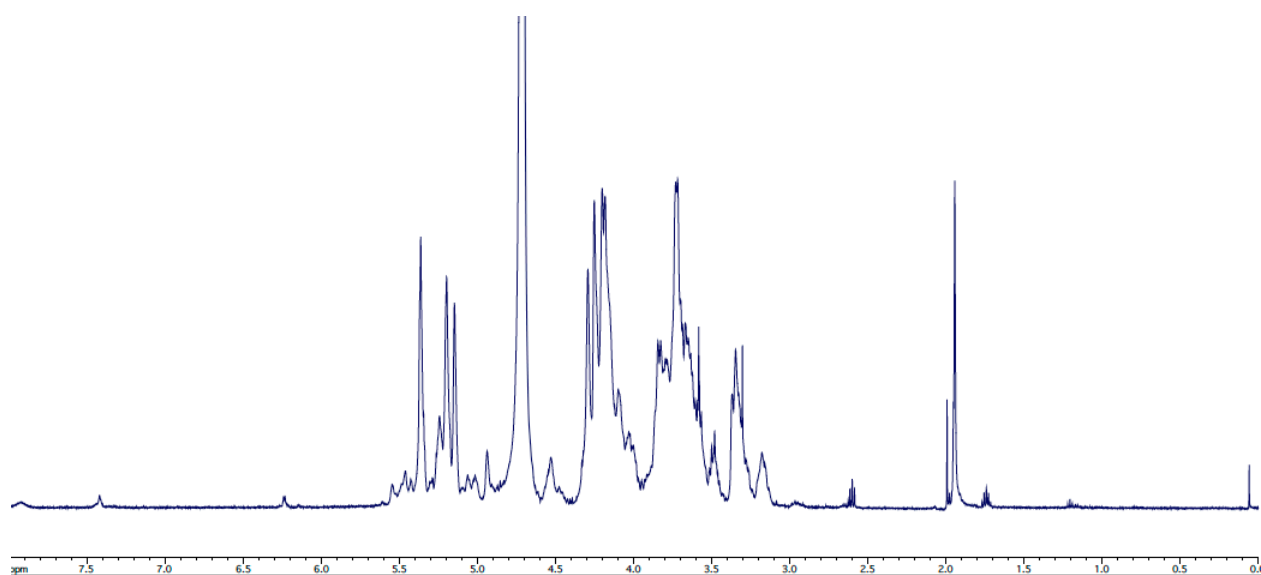

<sup>1</sup>H NMR spectrum of thiol-ene reaction of enoxaparin and mercaptoacetic acid (7).



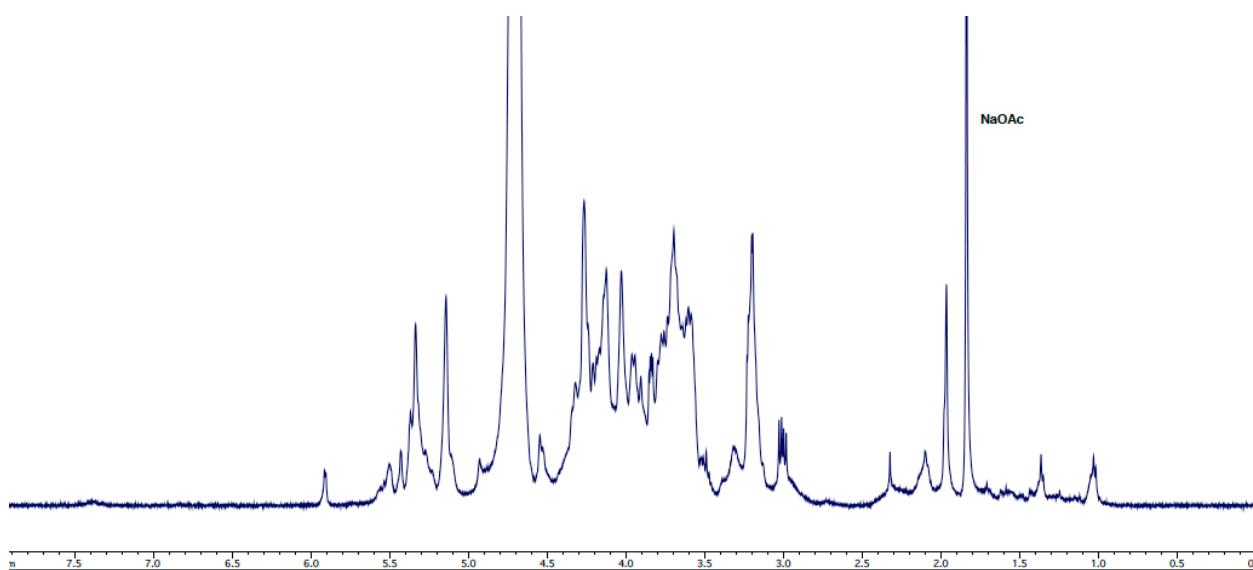

<sup>1</sup>H NMR spectrum of thiol-ene reaction of enoxaparin and L-cysteine (8).
